# Supplementary material for: The RNA binding proteins ZFP36L1 and ZFP36L2 are dysregulated in airway epithelium in human and a murine model of asthma
Source: PubMed Central journal article supplement (PMC10624177; doi:10.3389/fcell.2023.1241008), 2023-10-19
Supplement: DataSheet1.pdf [file DataSheet1.pdf]

*Supplementary Material*

**The RNA binding proteins ZFP36L1 and ZFP36L2 are dysregulated in airway epithelium in human and a murine model of asthma**

Jennifer Rynne, Elena Ortiz-Zapater, Dustin C. Bagley, Onofrio Zanin, George Doherty, Varsha Kanabar, David J. Jackson, Maddy Parsons, Jody Rosenblatt, Ian M. Adcock, Rocio T Martinez-Nunez\*

\* Correspondence: Rocio T. Martinez-Nunez: [rocio.martinez\\_nunez@kcl.ac.uk](mailto:rocio.martinez_nunez@kcl.ac.uk)

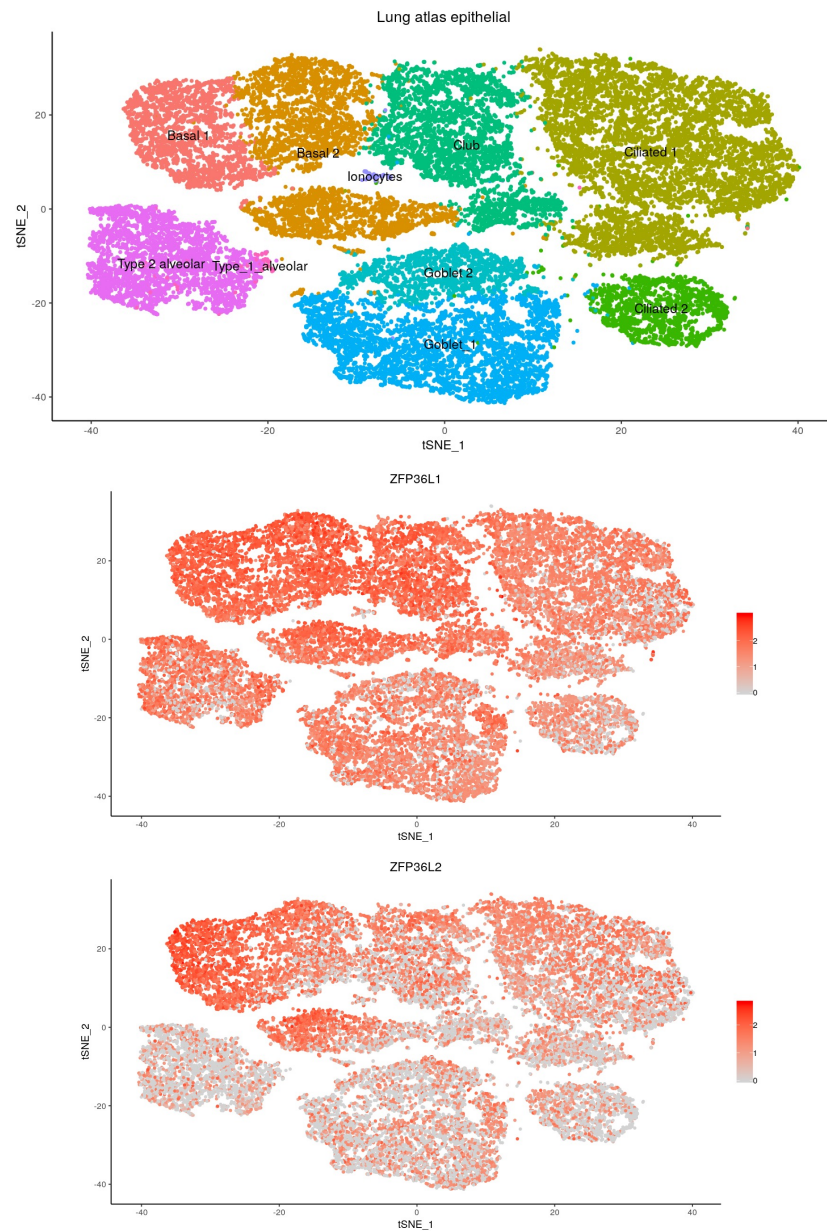

**Supplementary Figure 1. Epithelial cell expression of *ZFP36L1* and *ZFP36L2* encoding transcripts.** We interrogated the Lung Cell Atlas (<https://asthma.cellgeni.sanger.ac.uk/>) to determine the main airway epithelial cell type that presents *ZFP36L1* and *ZFP36L2* mRNA expression. While *ZFP36L1* was more diffusely present, *ZFP36L2* expression was more restricted to Basal 1 and Basal 2 type epithelial cells.

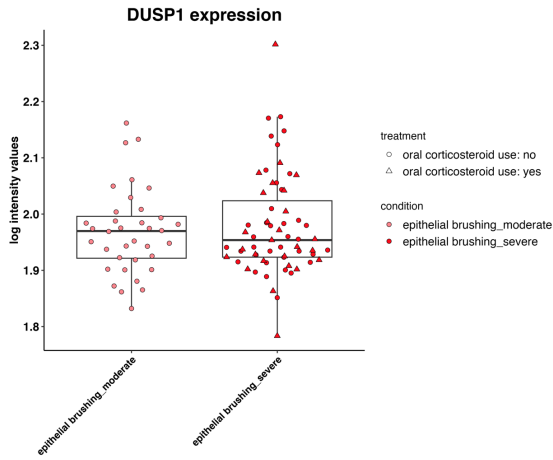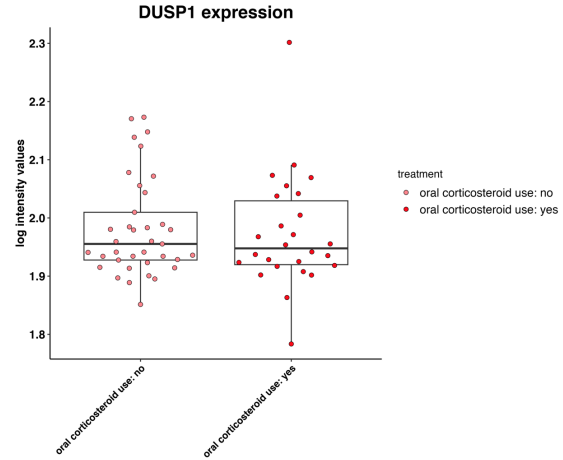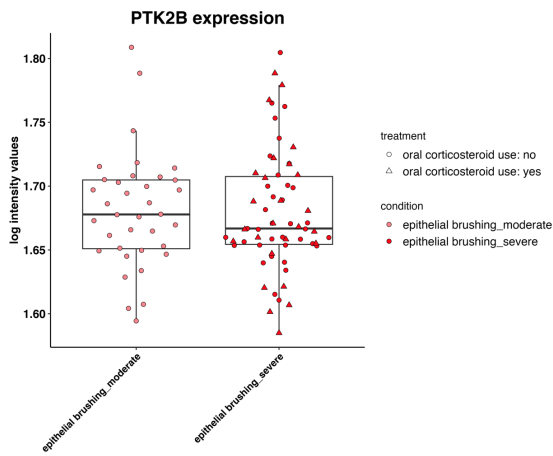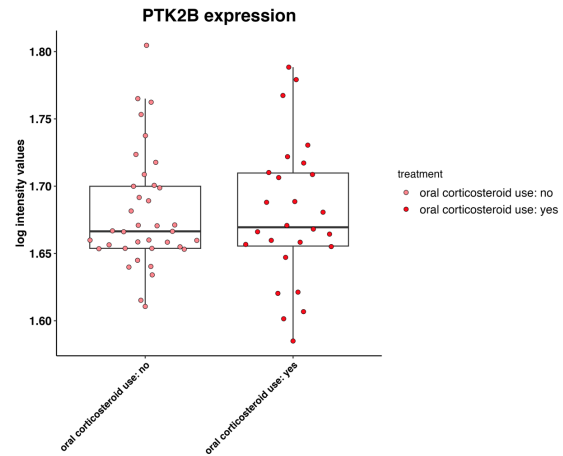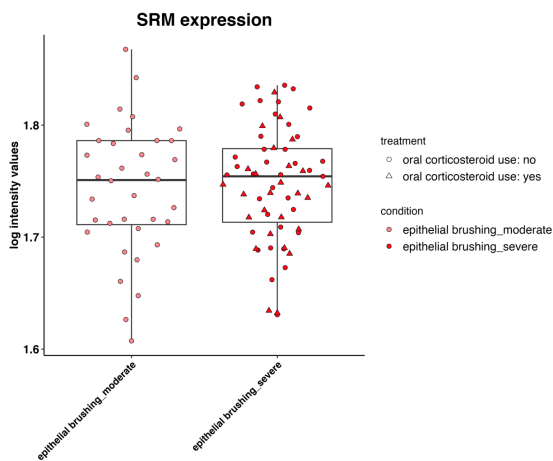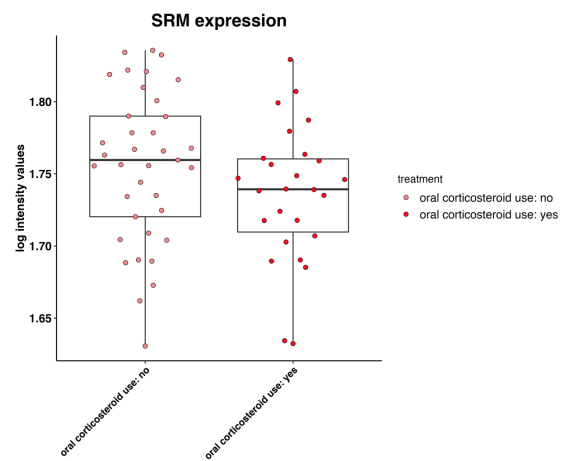

**Supplementary Figure 2. mRNA expression in asthma related transcripts in the U-BIOPRED dataset (GSE76227). Microarray data was analyzed using limma. Log intensity values are plotted.**

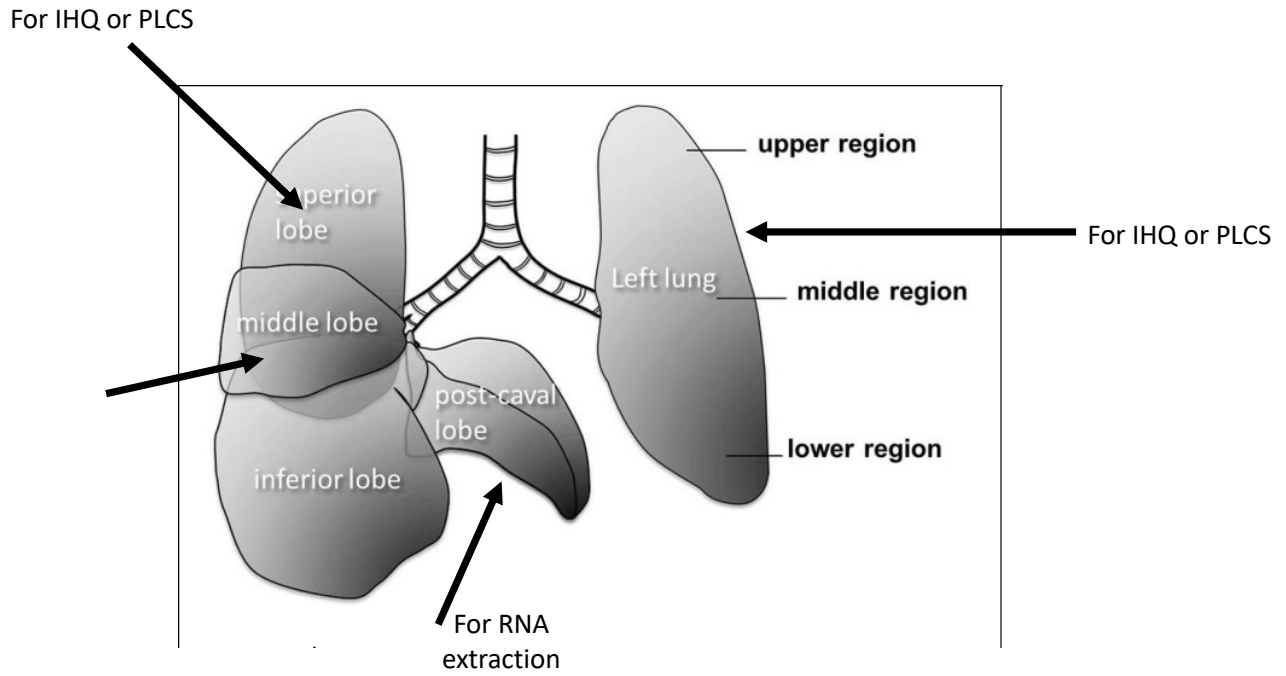

**Supplementary Figure 3. Lung regions employed in each experiment.** Diagram depicting the regions employed in our mice analyses.

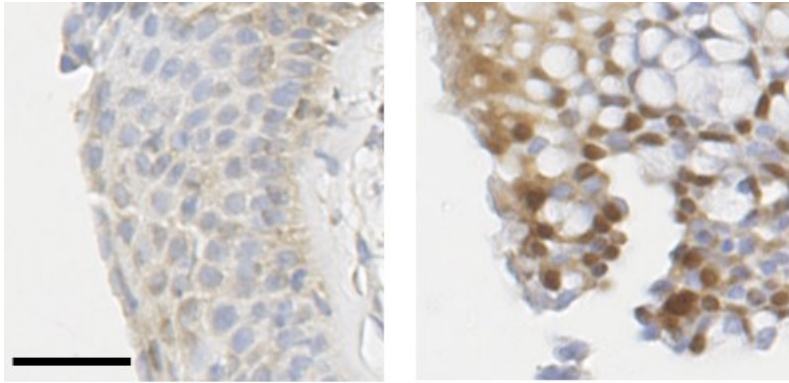

Healthy control

Severe asthma

**Supplementary Figure 4. Immunohistochemistry staining of ZFP36L2 in bronchial biopsies from healthy controls and patients with severe asthma.** Representative images of sections from a patients classified as healthy controls and a patient with severe asthma. Scale bar represents 50  $\mu\text{m}$ .

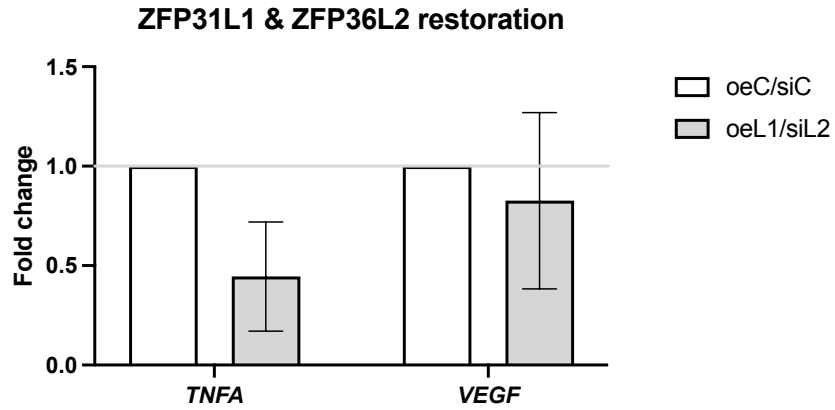

**Supplementary Figure 5. Restoration of ZFP36L1/L2 in bronchial epithelial cells from patients with severe asthma does not modulate *TNFA* or *VEGF* mRNA expression.**
